# Supplementary material
Source: Springer Nature journal article supplement (https://www.springermedizin.de/resource/supplementary/12890_2014_554_MOESM3_ESM.pdf/9505306)

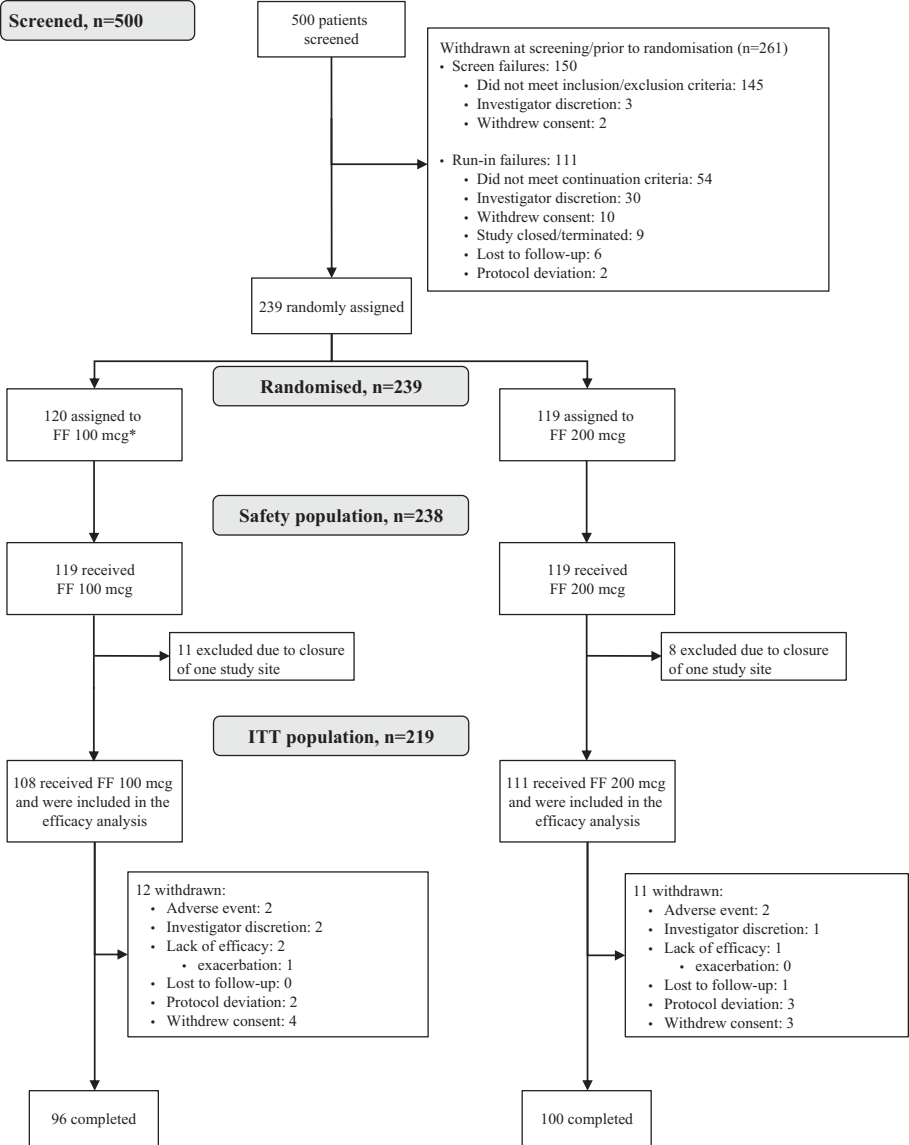

\*One patient was randomised in error and did not receive study medication.

Supplement: MOESM3 [file 9505306]
